# Supplementary material for: Logic inverters based on the property modulated Si nanowires by controlled surface modifications
Source: Royal Society of Chemistry journal article supplement (doi:10.1039/c1jm14719f), 2011-11-30
Supplement: c1jm14719f.pdf [file c1jm14719f.pdf]

## Electronic Supplementary Information

### Logic Inverters Based on the Property Modulated Si Nanowires by Controlled Surface Modifications

Kyeong-Ju Moon,<sup>a</sup> Tae-II Lee,<sup>a</sup> Woong Lee,<sup>b</sup> and Jae-Min Myoung\*<sup>a</sup>

<sup>a</sup> Department of Materials Science and Engineering, Yonsei University, 134 Shinchondong, Seoul, 120-749, Korea. Fax: +82-2-365-2680; Tel: +82-2-2123-2843; E-mail: [jmmyoung@yonsei.ac.kr](mailto:jmmyoung@yonsei.ac.kr)

<sup>b</sup> School of Nano & Advanced Materials Engineering, Changwon National University, 9 Sarim-Dong, Changwon, Gyeongnam 641-773, Korea.

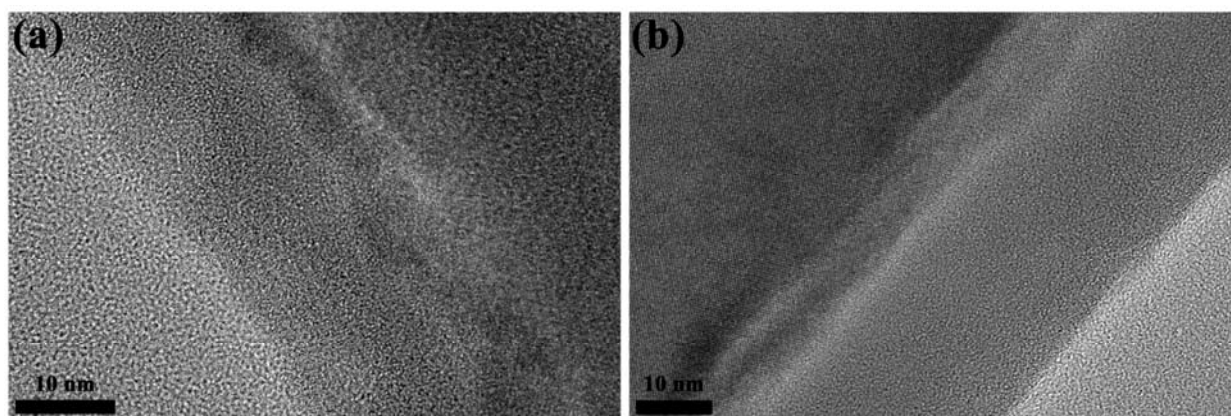

**Figure S1.** TEM images of heat treated *n*-type Si NWs for (a) 10 and (b) 20 min at 900 °C.

The surface of Si NWs was oxidized to SiO<sub>2</sub> at the rate of 1.3 nm a minute. The surface of NW is smoother than as synthesized NW.

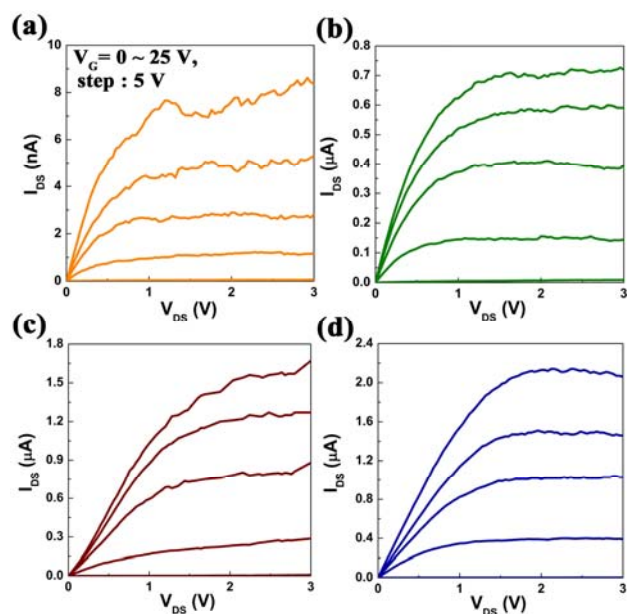

**Figure S2.** Output characteristics ( $I_{DS}$ –  $V_{DS}$ ) of (a) as-synthesized *n*-type Si NWs and heat treated Si NWs for (b) 10, (c) 20, and (d) 30 min.

**Table S3.** The electrical properties in each state were represented by numerical table

|                                                | as-synthesized | 10 min    | 20 min    | 30 min    |
|------------------------------------------------|----------------|-----------|-----------|-----------|
| <b>Mobility</b><br>( $\text{cm}^2/\text{Vs}$ ) | 1 ~ 40         | 40 ~ 100  | 110 ~ 440 | 190 ~ 450 |
| <b>Subthreshold swing</b><br>(V/decade)        | 1.4 ~ 4.0      | 1.4 ~ 2.1 | 1.4 ~ 2.3 | 1.3 ~ 2.1 |
| <b>Threshold voltage</b><br>( $V_{th}$ )       | -2 ~ 9         | -3 ~ 5    | -6 ~ 1    | -12 ~ -5  |
| <b>Yield (%)</b>                               | 9              | 67        | 92        | 89        |

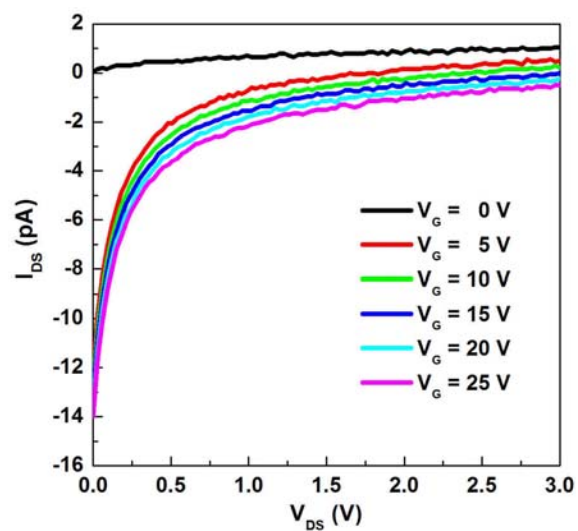

**Figure S4.** Typical  $I_{DS}$ –  $V_{DS}$  relations measured on a test structure prepared by depositing Ag and Au electrodes on cured PVP/SiO<sub>2</sub> without Si NWs.
